# Supplementary material for: Prognostic value of CD8CD45RO tumor infiltrating lymphocytes in patients with extrahepatic cholangiocarcinoma
Source: PubMed Central journal article supplement (PMC5955104; doi:10.18632/oncotarget.25163), 2018-05-04
Supplement: oncotarget-09-23366-s001.pdf [file oncotarget-09-23366-s001.pdf]

## Prognostic value of CD8CD45RO tumor infiltrating lymphocytes in patients with extrahepatic cholangiocarcinoma

### SUPPLEMENTARY MATERIALS

|                 | CD8- | CD8+ | P value | N=44        |             | P value |
|-----------------|------|------|---------|-------------|-------------|---------|
|                 |      |      |         | CD8+CD45RO- | CD8+CD45RO+ |         |
| Stage           |      |      | 0.55    |             |             | 0.52    |
| I               | 4    | 8    |         | 3           | 5           |         |
| II              | 9    | 16   |         | 9           | 7           |         |
| III             | 1    | 6    |         | 2           | 4           |         |
| Differentiation |      |      | 0.31    |             |             | 0.6     |
| Well            | 2    | 11   |         | 6           | 5           |         |
| Moderate        | 9    | 15   |         | 7           | 8           |         |
| Poorly          | 3    | 4    |         | 3           | 1           |         |

Supplementary Figure 1: Relationship between clinicopathological features and immune cell infiltration.

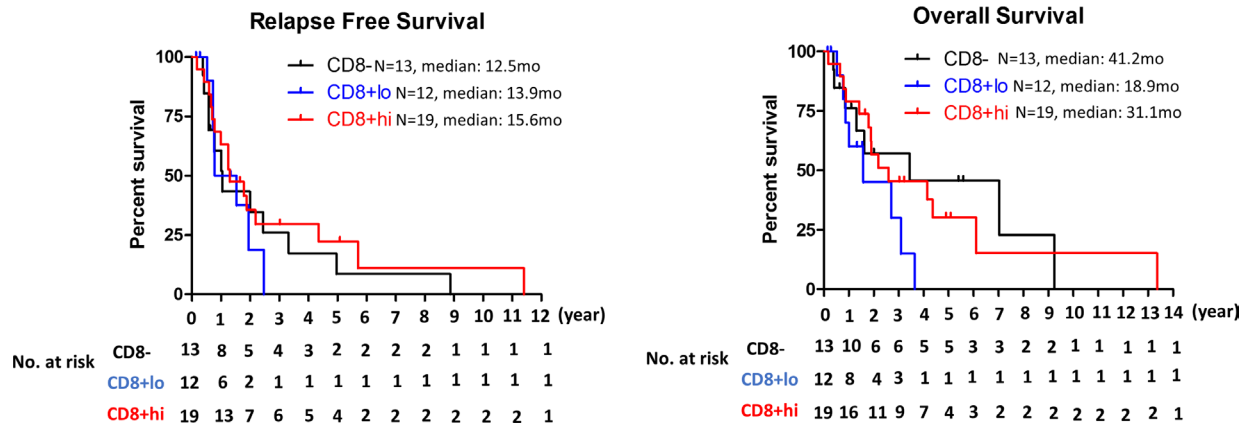

Supplementary Figure 2: Correlation between the presence of CD8+CD45RO+ TIL and RFS or OS.

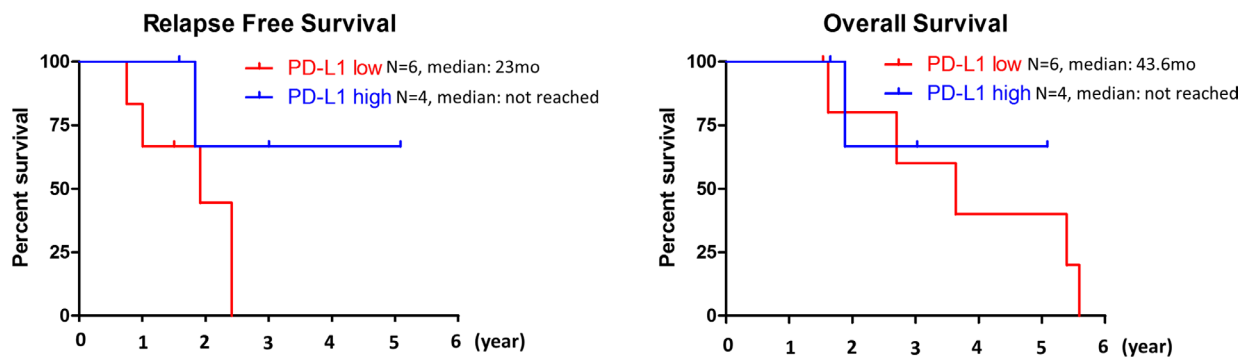

Supplementary Figure 3: Correlation between the level of PD-L1 expression and RFS or OS.
